# Supplementary material for: Understanding the Role of ATP Release through Connexins Hemichannels during Neurulation
Source: MDPI journal article supplement (doi:10.3390/ijms24032159), 2023-01-21
Supplement: s1 [file s1]

## Supplementary Materials

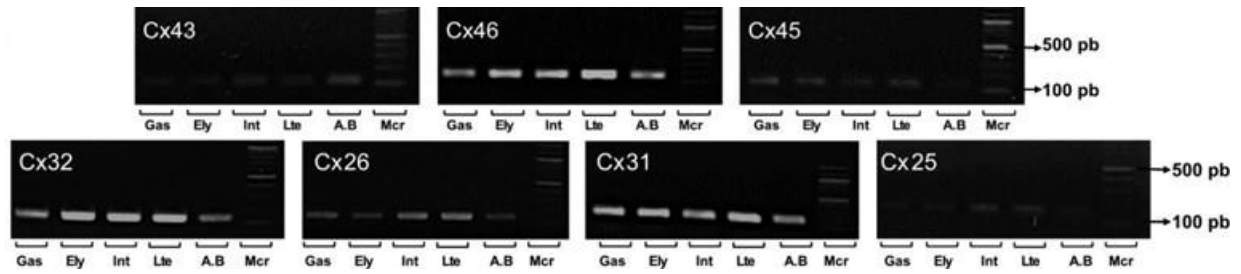

**Figure S1.** RT-PCR for Cx43, Cx46, Cx45, Cx32, Cx26, Cx31 y Cx25 at different stages of the development of *Xenopus laevis*. Lane 1. Gas (Gastrula stage 10), Lane 2. Ely (early stage 12.5), Lane 3. Int (Intermediate stage 14), Lane 4. Lte (Late stage 19-20), Lane 5. A.B. (Adult Brain) and Lane 6. Mcr (Marker 100 bp).

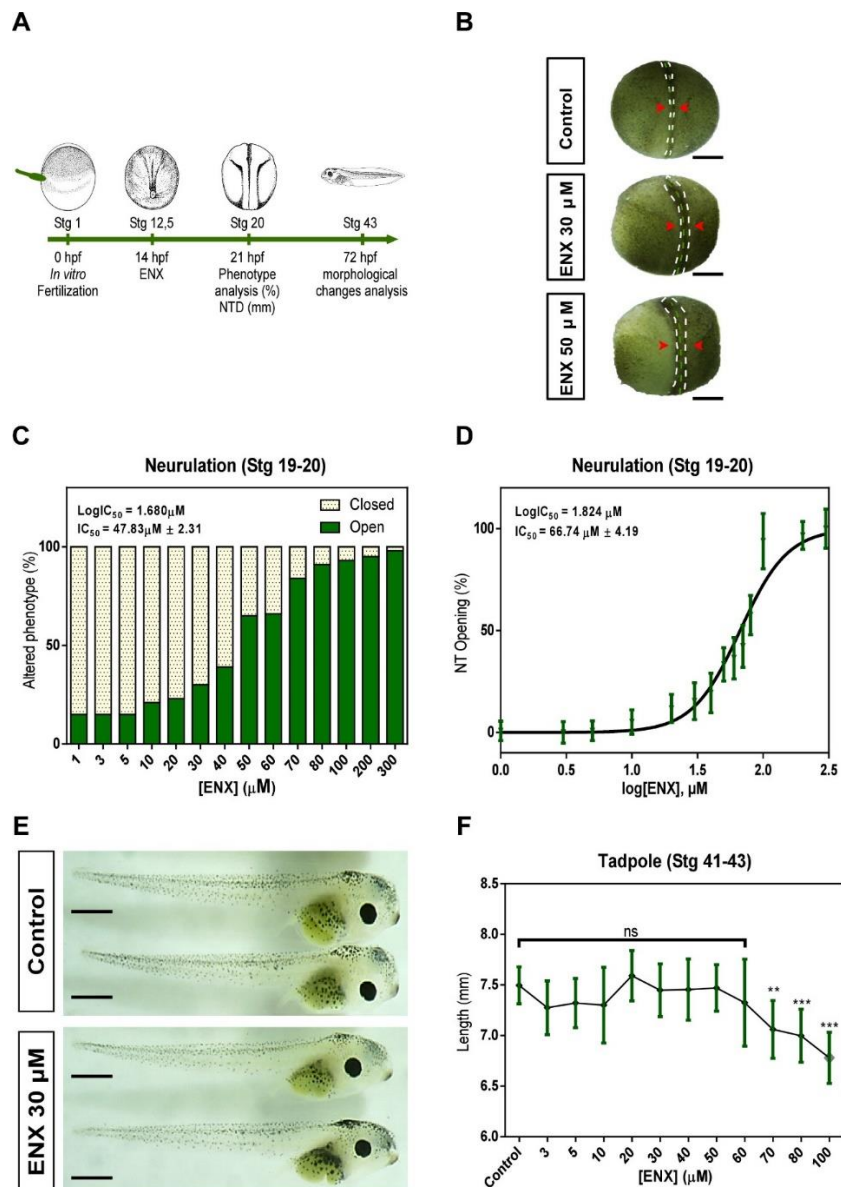

**Figure S2.** Pharmacological blockade of Cxs with ENX induces NTDs. A. The diagram depicts the stage (Stg) where ENX was initially applied to embryos (Stg 12.5 = 14 hpf). B. Representative photographs of embryos at stg 20 under control conditions (top) or treated with ENX (30 or 50  $\mu\text{M}$ , middle and bottom, respectively). Dashed white lines mark the border between superficial neural and non-neural ectoderm, dashed black lines indicate midline. Red arrow heads indicate the distance of neural folds (closed phenotype= normal; open phenotype= abnormal); scale bar = 500  $\mu\text{m}$ . C. The graph shows the percentage of open and closed phenotype of embryos treated in the absence (control=ctl) or presence of ENX (3-300  $\mu\text{M}$ ; IC<sub>50</sub>= 47.83  $\mu\text{M} \pm 2.31$ ). D. Quantification of open phenotype in embryos at stg 20 treated with ENX (IC<sub>50</sub>= 67.74  $\mu\text{M} \pm 4.19$ ). E. Phenotype of tadpoles (stg 41-43) treated with ENX at stg 12.5-20. Scale bar = 1 mm. F. The graph shows the effect of CBX on the length of Xenopus tadpoles. Independent fertilized embryos (N=6) were analyzed for condition (10 experimental replicates). One-way ANOVA, Dunnett's correction, \*\* =  $p < 0.01$ ; \*\*\* =  $p < 0.001$ ; ns= not significant). Error bars represent the standard deviation.

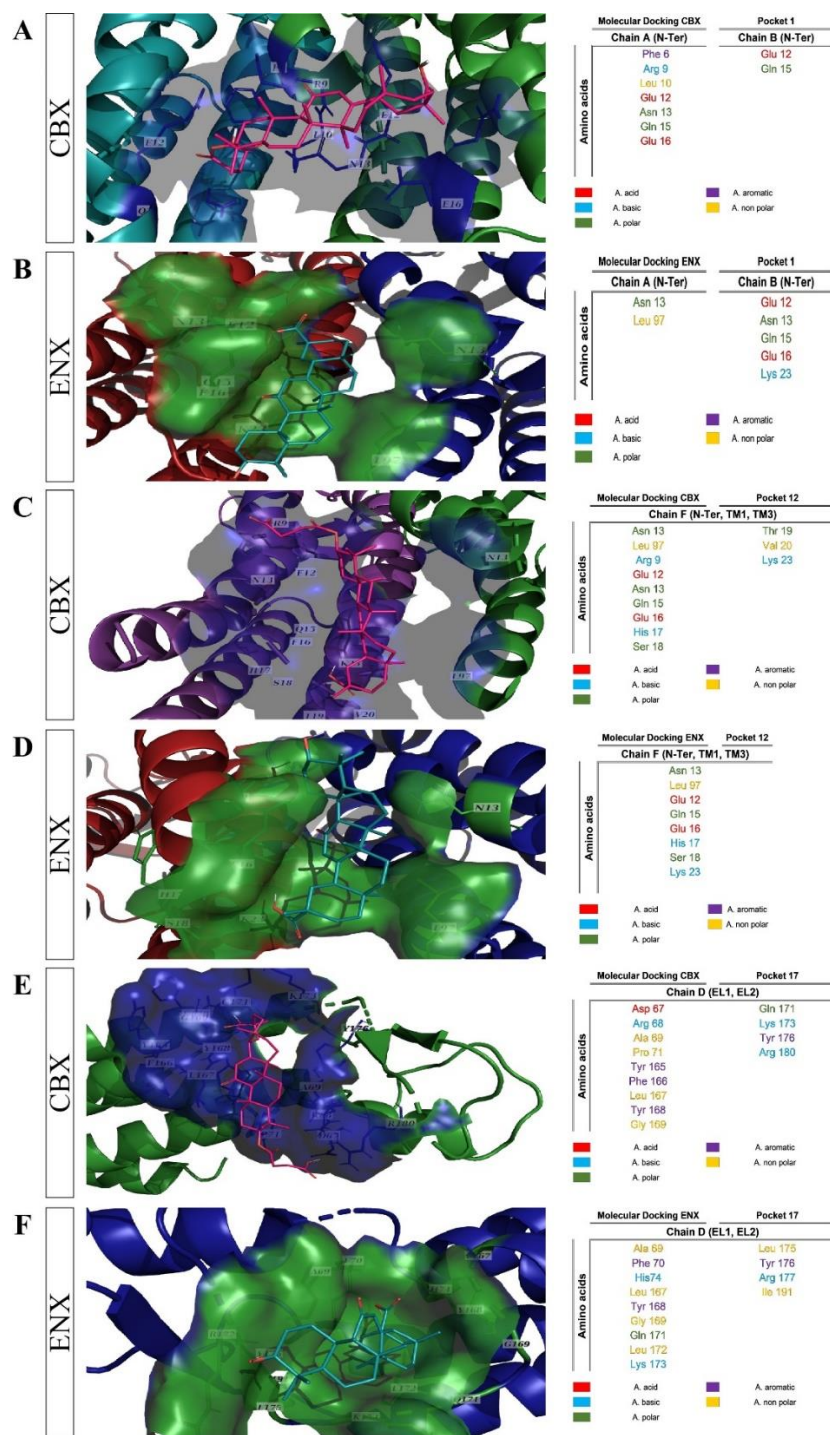

**Figure S3.** Molecular docking and involved amino acids of HC-Cx46 with carbenoxolone and enoxolone. A-F. Determination of CBX and ENX interaction site in HCs-Cx46, determined AutoDock Vina; summary table of amino acid residues involved in HC-Cx46/CBX (A, C, E) and HC-Cx46/ENX (B, D, F) interaction. Interactions with best binding energy score (-6.2 Kcal/mol (pocket 1); -4.8 Kcal/mol (pocket 12); -7.7 Kcal/mol (pocket 17) CBX) (-6.3 Kcal/mol (pocket 1); -5.3 Kcal/mol (pocket 12); -7.8 Kcal/mol (pocket 17) ENX). In blue (CBX) and green (ENX), regions identified for the docking of pharmacological blockers in HCs-Cx46.

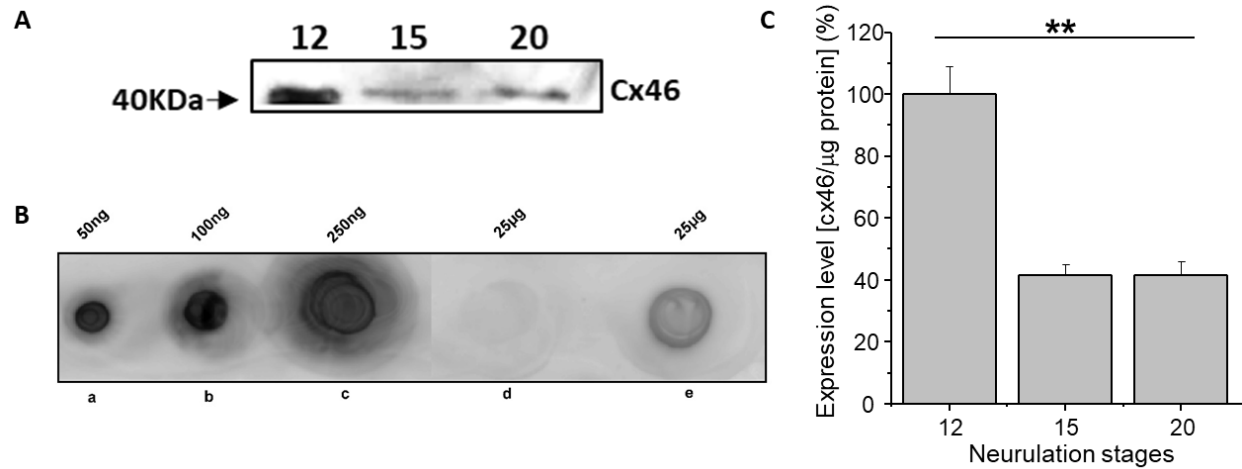

**Figure S4.** Cx46 is expressed during Neurulation in *Xenopus laevis*. **A**, Representative western blot showing the expression of cx46 in different stages of Neurulation in *Xenopus*. Lane 1 corresponds to stage 12; lanes 2 corresponds to stage 15; lane 3 corresponds to stage 20. A molecular weight marker is indicated with an arrow. **B**, Densitometric quantification of cx46 signal normalized by the total amount of protein loaded in each lane. Bars correspond to average  $\pm$  ES. (\*\* =  $p < 0.01$ ;  $n = 4$ ). **C**, Dot Blot Assay Anti-Cx46. a-c. Positive control (peptide sequence: CRLPSRNSRHSSNRS). d. Mouse cerebral Cortex. e. *Xenopus laevis* embryos stage 20.

**Table S1.** Set of primers used for RT-qPCR.

| <b>Gene</b>   | <b>Sense 5'-3'</b>          | <b>Antisense 5'-3'</b>     |
|---------------|-----------------------------|----------------------------|
| <b>Cx43</b>   | CCT GGG GCG ATG AAC AAT CA  | ACC CAG AAA CGC ACA TGA GA |
| <b>Cx38</b>   | CTGCCAGATGCTGTGAAACAT       | GTCCACACAGACTCACCTGC       |
| <b>Cx46</b>   | TGCCACTGGCTGAGATGTGAC       | ACCTTTTCGGCAGCTGATCC       |
| <b>Cx37</b>   | ATTGCTGGGGGAATACTAAGATCA    | TCAGACTGCTCATCTCCCCA       |
| <b>Cx45</b>   | GGC TGA CGG TGC TCA TCA TA  | AGG GGT GCA AAT GCA TCG TA |
| <b>Cx59</b>   | ACCTCCACAGTAAGCCACAC        | TGGGATGGTACCCACATGGA       |
| <b>Cx62</b>   | CTCCATTGAGGGGGTCCCTA        | TATTAGGGCAAGGGGACCGT       |
| <b>Cx32</b>   | CAGGAGAGCAGCTAACACATCT      | CCGCCACAAGCACCATGATA       |
| <b>Cx26</b>   | TCAGCGCACAGAGACCAATA        | AAATCGGACTGTTCGTCCCC       |
| <b>Cx31</b>   | TCCGTCCCAAGGTTGTCATT        | AACTTCTCTGCTGCGACCA        |
| <b>Cx31.1</b> | GTATCCCATGTCCGCCTCTG        | AATACTGAGTCCACTGCGGC       |
| <b>Cx25</b>   | GCTGCTTTTGAACATTTCATTGTCG   | GCTTCGGCTGCAACAACATA       |
| <b>Cx46.6</b> | GCTCAGGAACAAAACTGCCC        | CTCCTTGCTTTTCGTGAGCG       |
| <b>Cx30.2</b> | TTGGGCCCTACAGCTAGTGA        | AAGACTTCCCGCATCACACA       |
| <b>Cx40.1</b> | TGCACGGGGCAGTATTTCT         | TCTCTCTTTAGGCGCTCGGA       |
| <b>Sub1</b>   | AGC AGG AGA AAT GAA GCC AGG | CCG ACA TCT GCT CCT TCA GT |
